# Supplementary material
Source: PubMed Central journal article supplement (PMC5070759)
Supplement: aasm.39.11.2049s1.pdf [file aasm.39.11.2049s1.pdf]

**Table S1**—Questions delivered by the online survey

| Category                | Question                                                                                              | Possible answers                                                          |
|-------------------------|-------------------------------------------------------------------------------------------------------|---------------------------------------------------------------------------|
| Demographics            | To what age group do you belong?                                                                      | 18-24<br>25-34<br>35-44<br>45-54<br>55-64<br>65+                          |
|                         | Gender                                                                                                | Male<br>Female                                                            |
|                         | What is the main spoken language at home?                                                             | French<br>English<br>Other                                                |
| Sleep Bruxism           | Do you grind your teeth at night? If so, how frequently?                                              | Regularly<br>On occasion<br>Rarely<br>Never                               |
|                         | Other than yourself, do you have a family member that grinds their teeth at night?                    | Yes<br>No                                                                 |
|                         | If yes, who?                                                                                          | Father<br>Mother<br>Brother<br>Sister<br>Son<br>Daughter<br>Spouse        |
| Comorbidities:<br>Sleep | In general, how satisfied are you with current sleep quality?                                         | Very satisfied<br>Somewhat satisfied<br>Little satisfied<br>Not satisfied |
|                         | During the last month, did you have difficulties falling asleep?                                      | Yes<br>No                                                                 |
|                         | During the last month, did you have difficulties staying asleep?                                      | Yes<br>No                                                                 |
|                         | During the last month, did you have early awakening?                                                  | Yes<br>No                                                                 |
| Comorbidities:<br>Pain  | Do you suffer from chronic pain (headaches, back, fibromyalgia, orofacial) for more than three month? | Yes<br>No                                                                 |
|                         | If yes, what do you use as medication to alleviate your pain?                                         | Aspirin<br>Acetaminophen<br>Ibuprofen<br>opioids<br>Duloxetine<br>Nothing |
